# Supplementary material for: Electrodeposited antimony and antimony–gold nanocomposite modified carbon paste electrodes for the determination of heavy metal ions
Source: Royal Society of Chemistry journal article supplement (doi:10.1039/c4ay00876f), 2014-01-01
Supplement: c4ay00876f1.pdf [file c4ay00876f1.pdf]

### Supporting information

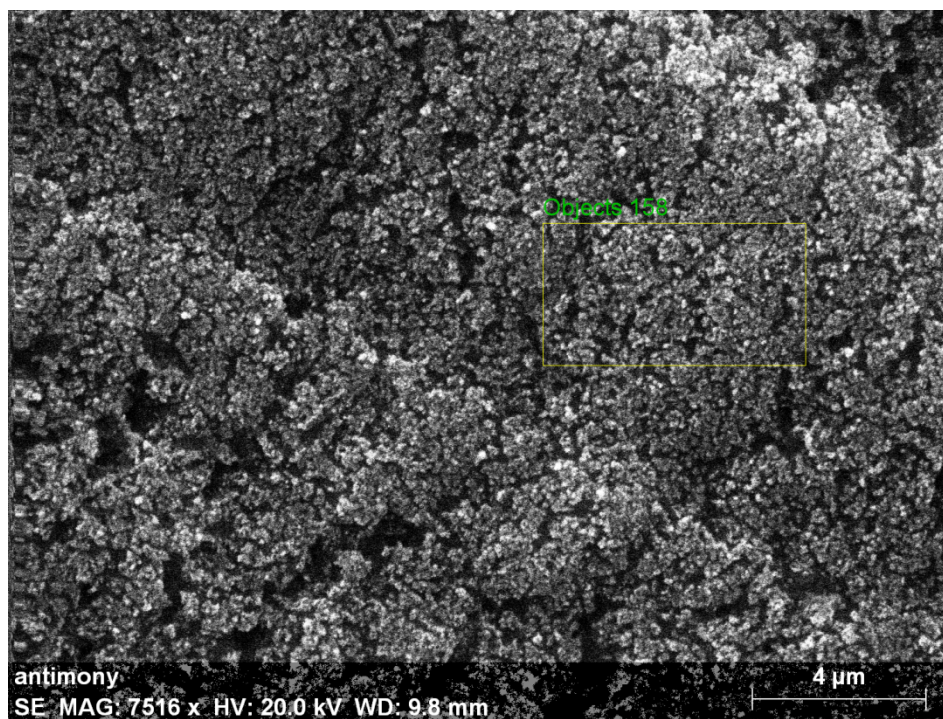

(A)

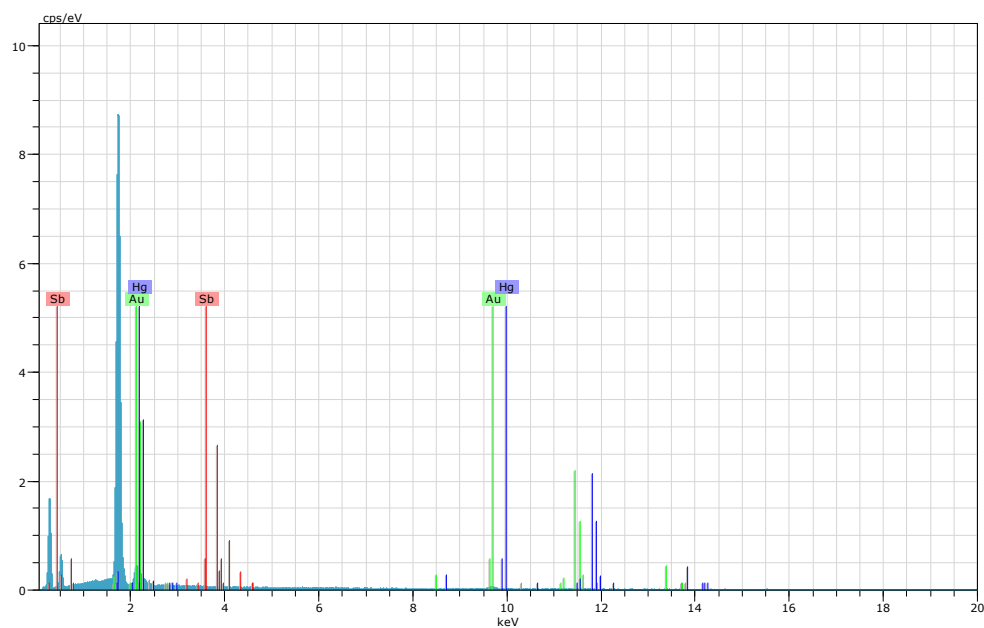

(B)

Figure S1. SEM (A) with EDS of area scans (B) spectra of Sb-Au composite film on which Hg was pre-concentrated.

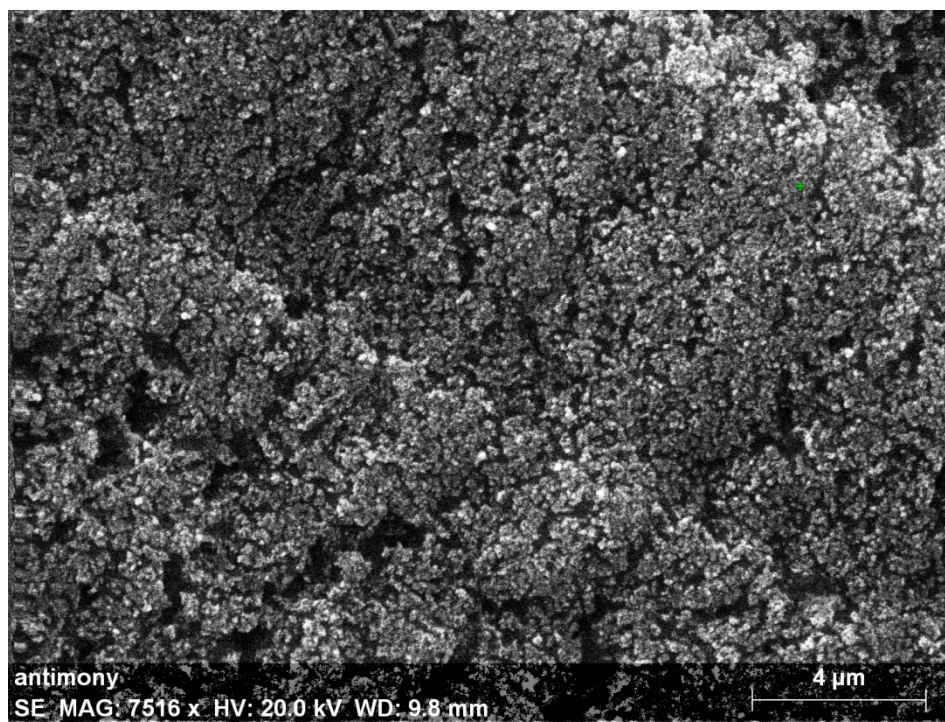

(A)

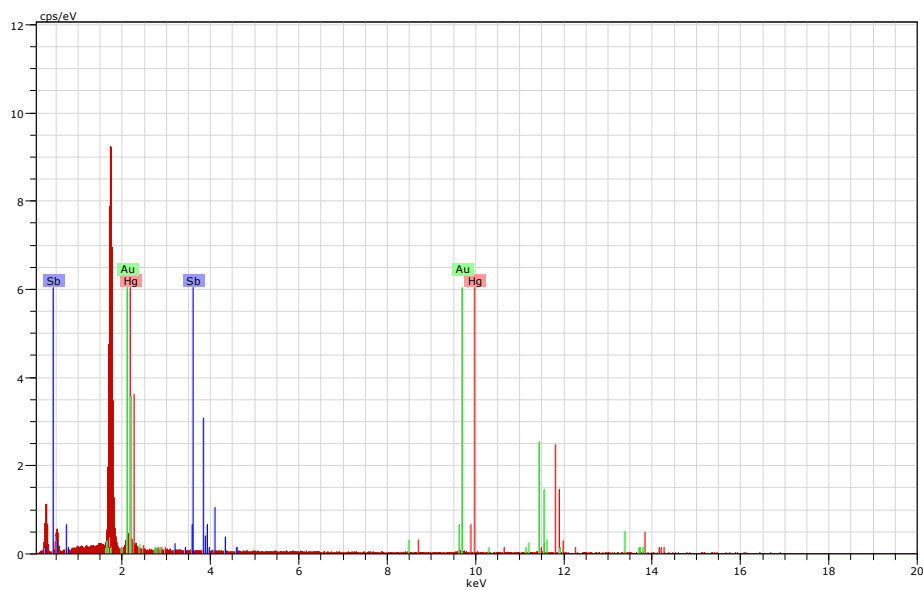

(B)

Figure S2. SEM (A) with EDS of point scans (B) spectra of Sb-Au composite film on which Hg was pre-concentrated.
